# Supplementary material for: Prediction of pathological complete response to neoadjuvant chemotherapy for invasive breast cancers based on longitudinal ultrasound and superb microvascular imaging: a single-center retrospective study
Source: PeerJ. 2025 Oct 14;13:e20171. doi: 10.7717/peerj.20171 (PMC12533535; doi:10.7717/peerj.20171)
Supplement: Supplemental Information 1 [file peerj-13-20171-s001.xlsx]

## Sheet: Sheet1
patient	age	PCR(0，No；1，Yes）	mSMI0(1,expand;0,No)	mSMI2(0，no change、expand；1，No expand）	mSMI4(0，no change、expand；1，No expand）	Echogenic rinds 0（1,yes;0,No）	Echogenic rinds 2（0,no change；1,disappear；2appear）	Echogenic rinds 4（0,no change；1,disappear；2appear）	ER	PR	Her2（IHC:negative recorded as 0;positive recorded as 1;2 are uncertain. FISH amplification as 1,no amplification as 0. If no FISH as 2）	ΔVI2	ΔVI4	ΔL2	ΔS2	ΔL4	ΔS4	T	LN（1,yes;0,No）	Clinical stage	ki67	ki67*100	Ki67（＜14,0;＞14,1）	L0	S0	VI0(average)	Menopausal status	biopsy pathology (invasive breast carcinoma(IBC);invasive breast carcinoma, non-specific type (IBC-NST);invasive lobular carcinoma (ILC))
1	42	0	1	0	0	1	0	0	1	1	0	46.3087	-57.047	33.3333	35.2941	36.6667	35.2941	2	1	II	0.2	20	1	3	1.7	9.93333	0	IBC-NST
2	45	0	1	0	0	0	0	0	1	1	0	69.2308	-98.7179	24.2424	28.5714	48.4848	57.1429	2	1	II	0.7	70	1	3.3	2.1	2.6	0	IBC-NST
3	25	0	1	0	0	0	0	0	1	1	0	-67.0455	26.1364	34.4828	-7.69231	37.931	15.3846	2	1	II	0.1	10	0	2.9	1.3	5.86667	0	IBC-NST
4	61	0	0	0	0	0	0	0	0	0	0	81.1099	82.3906	4.25532	55.5556	17.0213	55.5556	2	1	III	0.3	30	1	4.7	1.8	31.2333	1	IBC-NST
5	54	0	1	0	0	0	0	0	0	0	0	33.7209	-77.907	17.0732	27.2727	26.8293	22.7273	2	1	II	0.7	70	1	4.1	2.2	2.86667	1	IBC-NST
6	33	0	1	0	0	1	0	0	1	1	0	47.3424	43.2633	10.8696	-6.89655	8.69565	3.44828	4	1	III	0.4	40	1	4.6	2.9	26.9667	0	IBC-NST
7	57	0	0	0	0	0	0	0	1	1	0	57.0033	7.49186	0	-2.63158	10.7143	21.0526	4	1	III	0.4	40	1	5.6	3.8	10.2333	1	IBC-NST
8	66	0	0	0	0	0	0	0	0	0	0	15.6342	40.5605	23.0769	29.2683	46.1538	60.9756	4	0	III	0.4	40	1	5.2	4.1	22.6	1	IBC-NST
9	51	0	1	0	0	0	0	0	1	1	1	-141.667	-16.6667	37.931	47.0588	44.8276	52.9412	2	0	II	0.05	5	0	2.9	1.7	0.4	0	IBC-NST
10	51	0	1	0	0	1	1	1	1	1	1	47.1795	18.9744	0	52.381	4.34783	61.9048	2	0	II	0.05	5	0	2.3	2.1	6.5	0	IBC-NST
11	54	0	1	0	0	0	0	0	0	0	0	-33.5404	-93.7888	31.8182	16.6667	36.3636	44.4444	2	0	II	0.3	30	1	4.4	1.8	5.36667	1	IBC-NST
12	58	0	1	0	0	1	1	1	1	1	0	-37.2168	35.2751	9.52381	9.52381	9.52381	14.2857	2	0	II	0.4	40	1	4.2	2.1	10.3	1	IBC-NST
13	48	0	1	0	0	0	0	0	1	1	0	10.4046	87.5723	11.6279	13.3333	13.9535	26.6667	2	0	II	0.3	30	1	4.3	1.5	11.5333	0	IBC-NST
14	65	0	1	0	0	0	0	0	1	1	0	65.8777	12.0316	-12	7.69231	-20	-23.0769	2	1	III	0.15	15	1	2.5	1.3	16.9	1	IBC-NST
15	55	0	1	0	0	1	0	0	1	1	0	77.5	62.5	25	6.06061	27.0833	12.1212	2	0	II	0.2	20	1	4.8	3.3	6.66667	1	IBC-NST
16	65	0	1	0	0	0	0	0	1	0	0	-56.7951	-39.1481	-8.33333	-14.2857	-16.6667	0	2	1	II	0.25	25	1	1.2	0.7	16.4333	1	IBC-NST
17	65	0	1	1	1	0	0	0	1	0	0	25.4438	33.1361	-5.26316	0	15.7895	30	2	1	II	0.25	25	1	1.9	1	11.2667	1	IBC-NST
18	55	0	1	0	0	1	0	0	1	1	0	49.9195	68.599	3.92157	16.6667	23.5294	36.1111	3	1	II	0.4	40	1	5.1	3.6	20.7	1	IBC-NST
19	63	0	1	0	0	0	0	0	1	0	0	23.3333	80	12.1212	35	72.7273	70	2	1	II	0.4	40	1	3.3	2	2	1	ILC
20	64	0	1	0	0	0	0	0	0	0	1	37.4291	42.344	51.7241	37.5	48.2759	58.3333	2	1	III	0.6	60	1	5.8	2.4	17.6333	1	IBC-NST
21	41	0	1	0	0	0	0	0	1	0	1	26.6402	58.0517	0	34.4828	30.2326	65.5172	2	1	II	0.7	70	1	4.3	2.9	16.7667	0	IBC-NST
22	33	0	1	0	0	0	0	0	1	1	0	-4.92424	5.30303	15.625	33.3333	21.875	42.8571	2	0	II	0.6	60	1	3.2	2.1	8.8	0	IBC-NST
23	48	0	0	0	0	0	0	0	0	0	1	73.2026	90.1961	2.27273	31.5789	63.6364	63.1579	2	1	II	0.4	40	1	4.4	1.9	5.1	0	IBC-NST
24	52	0	1	0	0	0	0	0	1	1	0	-40.0641	-34.2949	17.3913	14.2857	63.0435	42.8571	2	1	II	0.4	40	1	4.6	1.4	10.4	0	IBC-NST
25	43	0	1	0	0	0	0	0	1	1	0	42.8152	4.39883	25	25.9259	47.7273	40.7407	2	1	III	0.3	30	1	4.4	2.7	11.3667	0	IBC-NST
26	64	0	1	0	0	0	0	0	1	1	0	-69.3182	84.0909	-7.69231	0	-307.692	-137.5	1	1	II	0.08	8	0	1.3	0.8	5.86667	1	IBC-NST
27	64	0	0	0	0	0	0	0	0	0	0	-66.436	-82.0069	23.0769	22.9167	-13.8462	31.25	4	1	III	0.9	90	1	6.5	4.8	9.63333	1	IBC-NST
28	40	0	1	1	1	0	0	0	1	1	0	32.2709	52.988	23.7288	20	42.3729	48	2	1	II	0.15	15	1	5.9	2.5	16.7333	0	IBC-NST
29	51	0	1	0	0	0	0	0	1	1	0	14.2276	41.0569	20.4545	0	20.4545	21.4286	2	1	III	0.4	40	1	4.4	1.4	8.2	1	IBC-NST
30	52	0	1	0	0	0	0	0	1	1	1	16.0156	26.5625	34.8837	31.8182	53.4884	50	2	0	II	0.3	30	1	4.3	2.2	17.0667	1	IBC-NST
31	37	0	1	0	0	0	0	0	1	1	0	-23.9669	40.0826	0	15.3846	-3.0303	15.3846	2	1	II	0.35	35	1	3.3	1.3	8.06667	0	IBC-NST
32	72	0	1	0	1	0	0	0	1	0	0	17.0569	35.4515	27.451	44	45.098	52	4	1	III	0.4	40	1	5.1	2.5	9.96667	1	IBC-NST
33	36	0	1	0	0	0	0	0	1	0	1	-47.3684	-46.8421	28.5714	41.6667	35.7143	58.3333	2	1	II	0.15	15	1	2.8	2.4	6.33333	0	IBC-NST
34	37	0	1	0	1	0	0	0	1	1	0	58.7719	69.2982	27.2727	15	27.2727	30	4	1	III	0.3	30	1	5.5	2	11.4	0	IBC-NST
35	52	0	1	0	0	1	1	1	1	1	0	52.7778	48.1481	9.09091	25	12.7273	15	4	1	III	0.15	15	1	5.5	2	10.8	0	IBC-NST
36	48	0	1	0	0	0	0	0	1	1	0	13.6364	3.0303	45.283	24	45.283	36	4	1	III	0.1	10	0	5.3	2.5	6.6	0	ILC
37	34	0	0	0	0	0	0	0	1	0	1	10.6825	40.6528	5.08475	14.2857	20.339	28.5714	4	1	III	0.6	60	1	5.9	1.4	33.7	0	IBC
38	65	0	0	0	0	1	0	0	1	1	0	-19.2118	-0.985222	2.38095	4.54545	4.7619	13.6364	3	1	III	0.2	20	1	4.2	2.2	20.3	1	IBC
39	57	0	1	0	0	0	0	0	1	1	0	16.9231	43.8462	-5.66038	23.0769	30.1887	38.4615	4	1	III	0.3	30	1	5.3	2.6	13	0	IBC
40	42	0	0	0	0	1	0	0	0	0	0	-12.234	-61.7021	34.6154	40.625	17.3077	9.375	4	1	III	0.7	70	1	5.2	3.2	18.8	0	medullary carcinoma
41	66	0	1	0	0	0	0	0	0	0	0	3.26087	17.3913	36.8421	29.4118	44.7368	41.1765	2	1	II	0.65	65	1	3.8	1.7	9.2	1	IBC
42	53	0	1	0	0	0	0	0	1	1	1	21.1538	75	6.38298	25	17.0213	50	2	1	II	0.35	35	1	4.7	1.6	10.4	0	IBC
43	29	0	1	1	1	0	0	0	0	0	0	34.5238	78.1746	47.0588	50	50	64.2857	2	1	III	0.9	90	1	3.4	1.4	25.2	0	IBC
44	67	0	0	0	0	0	0	0	0	0	0	-20	-2.06897	25	31.25	33.3333	18.75	2	0	II	0.3	30	1	3.6	1.6	14.5	1	IBC
45	62	0	0	0	0	0	0	0	1	0	0	0	47.619	15.2174	20	4.34783	35	2	1	III	0.25	25	1	4.6	2	10.5	1	IBC
46	45	0	1	0	0	0	0	0	0	0	1	57.6763	17.4274	37.037	15.7895	38.8889	42.1053	2	1	II	0.3	30	1	5.4	1.9	24.1	0	IBC
47	53	0	1	0	0	0	0	0	1	1	1	38.5965	68.4211	13.6364	22.2222	34.0909	22.2222	2	0	II	0.8	80	1	4.4	1.8	5.7	0	IBC
48	39	0	1	0	0	0	0	0	1	1	0	-33.3333	-40.796	11.6667	9.09091	-23.3333	40.9091	3	1	III	0.1	10	0	6	2.2	20.1	0	IBC
49	31	0	0	0	0	0	0	0	0	0	1	10.4938	68.5185	38.9831	0	18.6441	-52	3	1	III	0.3	30	1	5.9	2.5	16.2	0	metaplastic carcinoma
50	31	0	0	0	0	1	0	0	1	1	0	25	54.3478	6.12245	10	44.898	46.6667	2	1	III	0.7	70	1	4.9	3	9.2	0	IBC
51	50	0	1	0	0	1	1	1	1	1	0	26.8817	53.7634	45.4545	47.0588	45.4545	64.7059	2	1	II	0.3	30	1	2.2	1.7	9.3	0	IBC
52	56	0	0	0	0	0	0	0	0	0	0	20	32.3077	28	24	48	44	3	1	III	0.35	35	1	5	2.5	19.5	1	IBC
53	43	0	0	0	0	1	0	0	1	1	1	27.7778	61.1111	46.875	61.7021	57.8125	72.3404	3	1	III	0.5	50	1	6.4	4.7	10.8	0	IBC
54	57	0	1	0	0	0	0	0	1	1	0	29.0323	51.6129	14.2857	28.5714	32.6531	35.7143	2	1	III	0.25	25	1	4.9	1.4	18.6	1	IBC
55	61	0	1	0	0	0	0	0	1	1	0	6.97674	-4.65116	21.4286	5.26316	10.7143	5.26316	2	1	III	0.6	60	1	2.8	1.9	4.3	1	IBC
56	38	0	0	0	0	0	0	0	0	0	0	-50.8671	-1.15607	-22.8571	-13.3333	-28.5714	-33.3333	2	1	III	0.9	90	1	3.5	1.5	17.3	0	IBC
57	43	1	1	0	0	1	0	1	0	0	0	26.738	48.1283	46.1538	75	69.2308	75	2	1	III	0.85	85	1	2.6	1.6	6.23333	0	IBC-NST
58	53	1	1	1	1	0	0	0	1	1	0	6.0241	94.2771	9.67742	35.2941	9.67742	58.8235	2	1	III	0.55	55	1	3.1	1.7	11.0667	1	IBC-NST
59	53	1	1	1	1	1	1	1	1	0	1	83.6502	91.635	22.2222	43.75	25.9259	56.25	2	1	II	0.7	70	1	2.7	1.6	8.76667	1	IBC-NST
60	70	1	1	0	0	0	0	0	0	0	0	61.8497	74.8555	42.3077	36.3636	53.8462	54.5455	2	1	III	0.4	40	1	2.6	2.2	11.5333	1	IBC-NST
61	67	1	1	0	1	0	0	0	0	1	1	59.8639	56.4626	7.8125	35.2941	35.9375	58.8235	3	1	III	0.4	40	1	6.4	1.7	14.7	1	IBC
62	52	1	1	0	1	0	0	0	0	0	1	79.1741	85.8169	71.4286	72.2222	75	83.3333	2	1	II	0.8	80	1	2.8	1.8	18.5667	1	IBC
63	47	1	1	0	1	0	0	0	0	0	1	41.8919	91.8919	20	52.9412	56	76.4706	2	1	III	0.1	10	0	5	1.7	7.4	0	IBC-NST
64	39	1	1	0	1	0	0	0	0	0	1	89.0365	96.6777	50	58.3333	66.6667	75	2	1	II	0.15	15	1	1.8	1.2	10.0333	0	IBC-NST
65	55	1	0	0	0	0	0	0	0	0	1	56.0976	80.1394	34.7826	52.9412	39.1304	58.8235	4	0	III	0.4	40	1	2.3	1.7	28.7	0	IBC-NST
66	44	1	1	1	1	1	1	1	1	1	1	6.25	84.1667	68.1818	57.1429	72.7273	78.5714	2	1	II	0.4	40	1	4.4	1.4	16	0	IBC-NST
67	48	1	1	0	1	0	0	0	0	0	1	30.2158	39.5683	10	60	55	76	2	1	III	0.1	10	0	4	2.5	9.26667	0	IBC-NST
68	40	1	1	1	1	0	0	0	1	1	0	23.4615	1.15385	15.3846	23.0769	43.5897	30.7692	2	1	III	0.2	20	1	3.9	1.3	8.66667	0	IBC-NST
69	28	1	1	1	1	0	0	0	1	1	1	83.2474	90.2062	0	65	3.0303	70	2	0	II	0.8	80	1	3.3	2	12.9333	0	IBC-NST
70	42	1	1	0	1	0	0	0	0	0	0	29.9127	52.6201	57.5758	59.0909	72.7273	72.7273	2	0	II	0.4	40	1	3.3	2.2	15.2667	0	IBC-NST
71	53	1	1	1	1	0	0	0	1	0	1	41.9355	91.2023	9.375	50	56.25	65	2	1	III	0.3	30	1	3.2	2	11.3667	1	IBC-NST
72	60	1	1	1	1	1	1	1	0	0	1	15.7576	22.4242	20	54.5455	40	77.2727	2	1	II	0.4	40	1	3.5	2.2	5.5	1	IBC-NST
73	56	1	0	0	0	0	0	0	1	1	1	55.7692	60.503	57.5758	59.0909	63.6364	77.2727	4	0	III	0.7	70	1	3.3	2.2	22.5333	1	IBC-NST
74	55	1	0	0	0	0	0	0	1	1	1	87.0588	98.4314	3.7037	41.6667	59.2593	66.6667	2	0	II	0.6	60	1	2.7	1.2	25.5	1	IBC-NST
75	35	1	0	0	0	0	0	0	1	1	1	74.7405	56.5744	32.6923	74.0741	36.5385	81.4815	3	1	III	0.4	40	1	5.2	2.7	19.2667	0	IBC-NST
76	46	1	1	1	1	0	0	0	1	1	1	80.6202	72.8682	60	66.6667	80	80	2	0	II	0.5	50	1	2.5	1.5	8.6	0	IBC-NST
77	65	1	1	0	0	0	0	0	0	0	1	86.1538	76.9231	62.5	54.5455	65	63.6364	2	1	III	0.25	25	1	4	1.1	4.33333	1	IBC-NST
78	46	1	1	1	1	1	1	1	0	0	0	74.6154	86.1538	55	53.3333	55	66.6667	2	0	II	0.95	95	1	2	1.5	4.33333	0	IBC-NST
79	54	1	1	0	1	1	1	1	1	1	1	6.2201	61.244	13.3333	50	37.7778	68.1818	2	1	II	0.2	20	1	4.5	2.2	6.96667	1	IBC-NST
80	44	1	1	0	1	0	0	0	1	1	1	95.4849	92.8094	60.8696	45.4545	65.2174	63.6364	2	0	II	0.3	30	1	2.3	1.1	19.9333	0	IBC-NST
81	34	1	1	1	1	0	0	0	1	0	1	77.9116	84.739	0	64.7059	64.7059	70.5882	2	0	II	0.4	40	1	3.4	1.7	8.3	0	IBC-NST
82	62	1	1	0	0	0	0	0	1	1	1	44.186	60.4651	11.4286	29.4118	11.4286	47.0588	2	1	III	0.3	30	1	3.5	1.7	2.86667	1	IBC-NST
83	53	1	1	0	1	0	0	0	0	0	1	35.2564	50.641	30.4348	42.8571	52.1739	64.2857	2	1	II	0.3	30	1	2.3	1.4	5.2	1	IBC-NST
84	48	1	1	1	1	0	0	0	0	0	1	69.3333	100	65	54.5455	100	100	2	1	II	0.4	40	1	2	1.1	2.5	0	IBC-NST
85	38	1	1	1	1	0	0	0	0	0	1	40.8759	75.9124	41.1765	56.25	55.8824	62.5	2	1	III	0.3	30	1	3.4	1.6	9.13333	0	IBC-NST Paget
86	42	1	1	1	1	1	1	1	0	0	0	65.4028	100	47.8261	73.3333	100	100	1	1	III	0.9	90	1	2.3	1.5	7.03333	0	IBC-NST
87	60	1	0	0	0	1	1	1	1	0	1	80.4416	88.959	25	52.9412	60	76.4706	2	1	II	0.3	30	1	2	1.7	10.5667	1	IBC-NST
88	46	1	0	0	0	1	1	1	1	0	1	59.2593	94.8148	0	36.8421	29.7297	63.1579	2	0	II	0.4	40	1	3.7	1.9	13.5	0	IBC
89	53	1	1	0	1	1	0	1	0	0	1	60.6061	96.6942	44.2308	66.6667	48.0769	70.8333	4	1	III	0.2	20	1	5.2	2.4	36.3	0	IBC
90	64	1	0	0	0	1	1	1	0	0	0	63.2075	92.4528	0	20	41.6667	20	2	1	III	0.2	20	1	2.4	1	10.6	1	IBC
91	50	1	0	0	0	1	1	1	0	0	0	60.2273	94.3182	37.931	53.3333	37.931	60	2	1	III	0.8	80	1	2.9	1.5	8.8	0	IBC
92	56	1	0	0	0	0	0	0	0	0	0	61.5385	88.4615	33.3333	41.6667	38.8889	58.3333	2	1	III	0.2	20	1	3.6	1.2	13	1	IBC
93	40	1	0	0	0	1	1	1	1	1	0	68.7345	95.2854	34.1463	35	46.3415	55	2	1	III	0.4	40	1	4.1	2	40.3	0	IBC
94	30	1	0	0	0	1	1	1	0	0	1	65.7534	80.137	68.0851	60	78.7234	66.6667	2	0	II	0.15	15	1	4.7	1.5	14.6	0	IBC
95	40	1	1	1	1	1	1	1	1	1	0	78.9474	95.1754	42.8571	55.5556	50	66.6667	2	0	II	0.2	20	1	2.8	1.8	22.8	0	IBC
96	34	1	1	1	1	0	0	0	0	0	0	96.4539	100	40.7407	62.5	55.5556	62.5	2	1	II	0.95	95	1	2.7	1.6	28.2	0	IBC
97	29	1	0	0	0	0	0	0	0	0	0	48.8636	76.1364	11.1111	30	16.6667	40	2	1	III	0.8	80	1	1.8	1	17.6	0	IBC
98	55	1	1	0	0	1	1	1	0	0	1	83.5391	99.177	25	45.4545	37.5	72.7273	2	1	III	0.4	40	1	4.8	2.2	24.3	1	IBC
99	50	1	1	1	1	1	0	1	0	0	0	62.0879	89.5604	24.2424	18.75	33.3333	56.25	2	0	II	0.4	40	1	3.3	1.6	18.2	1	IBC
100	58	1	1	1	1	1	1	1	0	0	1	66.6667	91.0256	35.4839	42.1053	35.4839	63.1579	2	1	II	0.15	15	1	3.1	1.9	15.6	1	IBC
101	62	1	0	0	0	1	0	0	0	1	1	48.2759	86.2069	48.1481	41.1765	51.8519	58.8235	2	0	II	0.2	20	1	2.7	1.7	5.8	1	IBC
102	59	1	0	0	0	1	1	1	0	0	1	87.234	95.7447	58.1818	75	63.6364	78.5714	3	1	III	0.5	50	1	5.5	2.8	23.5	1	IBC
103	51	1	0	0	0	0	0	0	0	0	1	80.1282	96.7949	48.8372	62.5	83.7209	62.5	2	1	III	0.4	40	1	4.3	1.6	15.6	1	IBC
104	59	1	1	1	1	0	0	0	0	0	1	73.0159	73.545	50.9434	52.6316	67.9245	68.4211	3	1	III	0.3	30	1	5.3	1.9	18.9	1	IBC
105	64	1	1	1	1	0	0	0	0	0	1	94.2857	99.4286	70.9677	64.2857	80.6452	64.2857	2	0	II	0.8	80	1	3.1	1.4	17.5	1	IBC
106	25	1	0	0	0	1	1	1	1	0	1	79.3103	95.4023	57.7778	72.7273	57.7778	77.2727	2	1	III	0.7	70	1	4.5	2.2	17.4	0	IBC
107	39	1	1	1	1	0	0	0	1	1	1	77.7778	96.5812	57.6923	60	59.6154	66.6667	2	1	II	0.3	30	1	5.2	1.5	11.7	0	IBC
